# Supplementary material
Source: PubMed Central journal article supplement (PMC3058239)

Webfigure 1.

### Ten Year

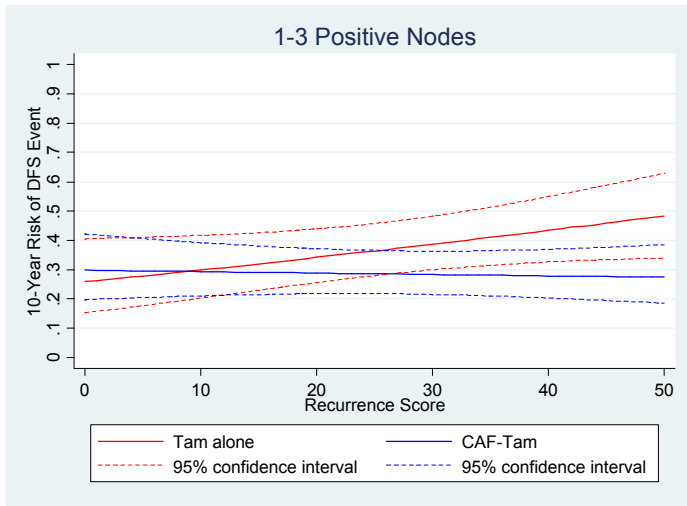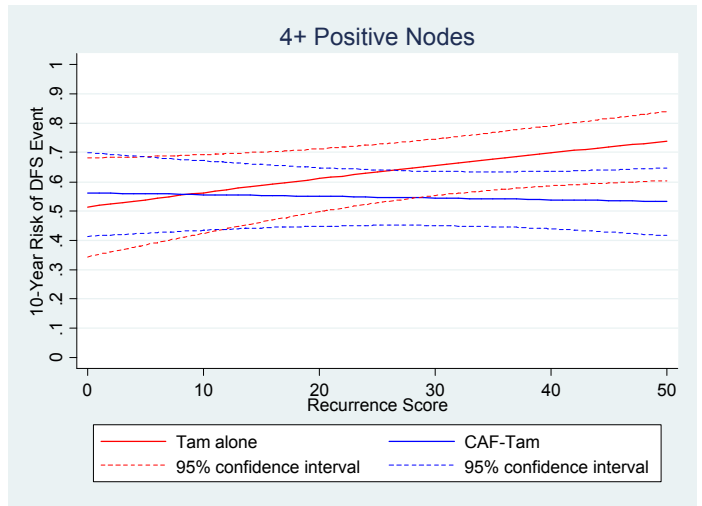

### Five Year

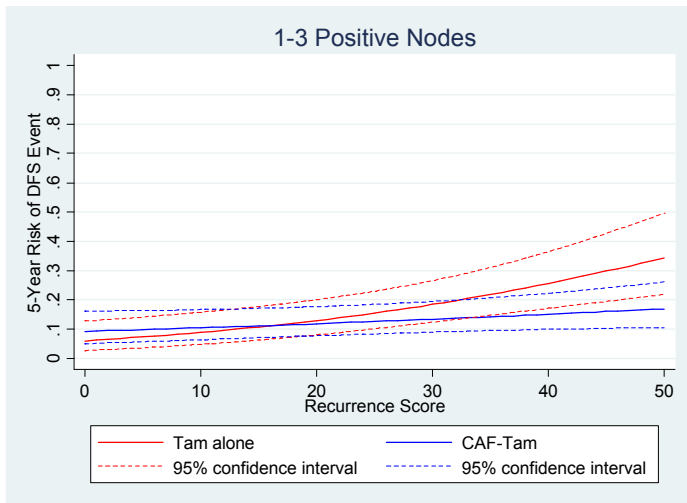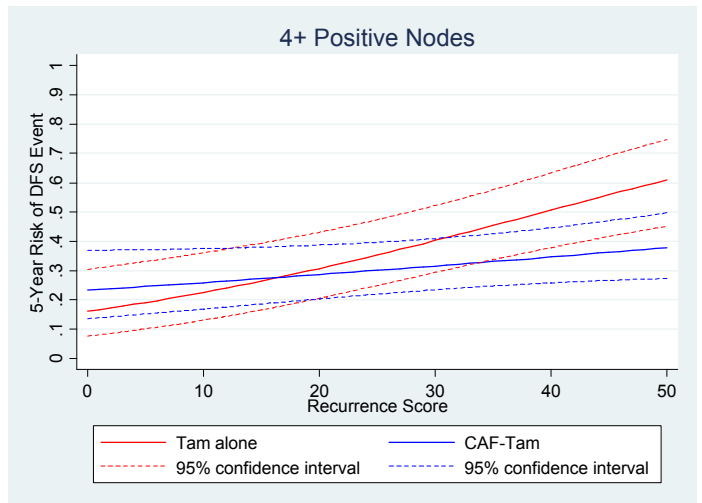

Webfigure 2.

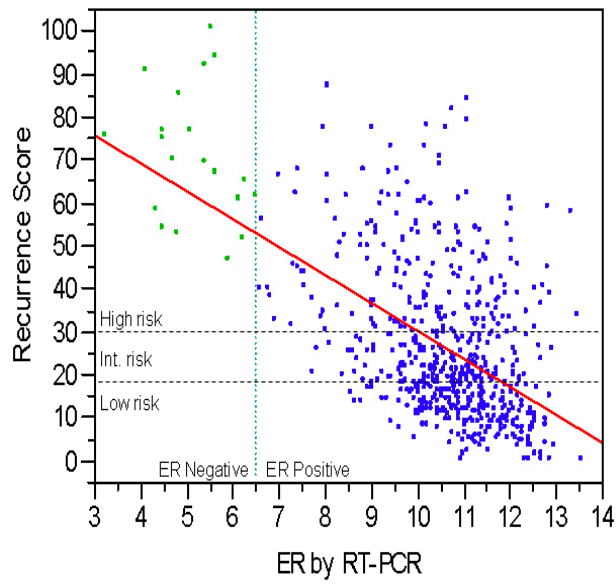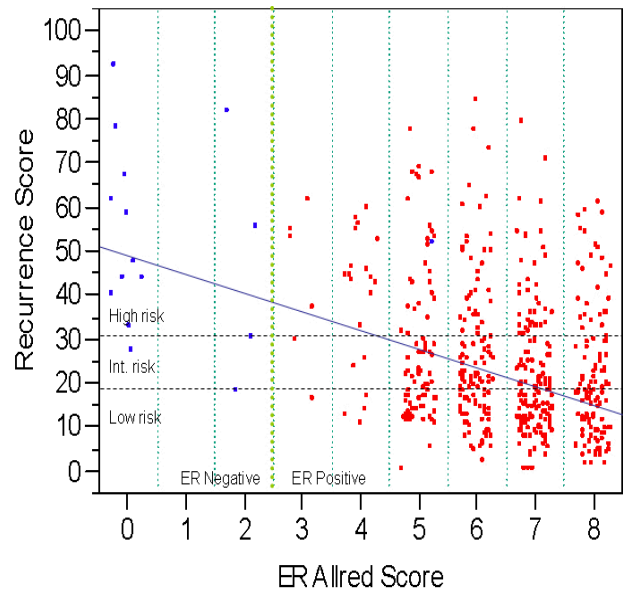

Supplement: NIHMS227230-supplement-supplement_1.pdf [file NIHMS227230-supplement-supplement_1.pdf]
